# Supplementary material
Source: publisher site journal article supplement (https://www.spandidos-publications.com/5690/downloadSupplementary)

Figure S1. Induction of human hepatocyte-like cells from iPS cells. (A) Albumin, (B) Cyp3A4 and (C) SOX2 mRNA expression was determined by reverse transcription-quantitative PCR to confirm induction of human hepatocyte-like cells from iPS cells. Data are presented as the mean  $\pm$  SD of three independent experiments. \*P<0.05.

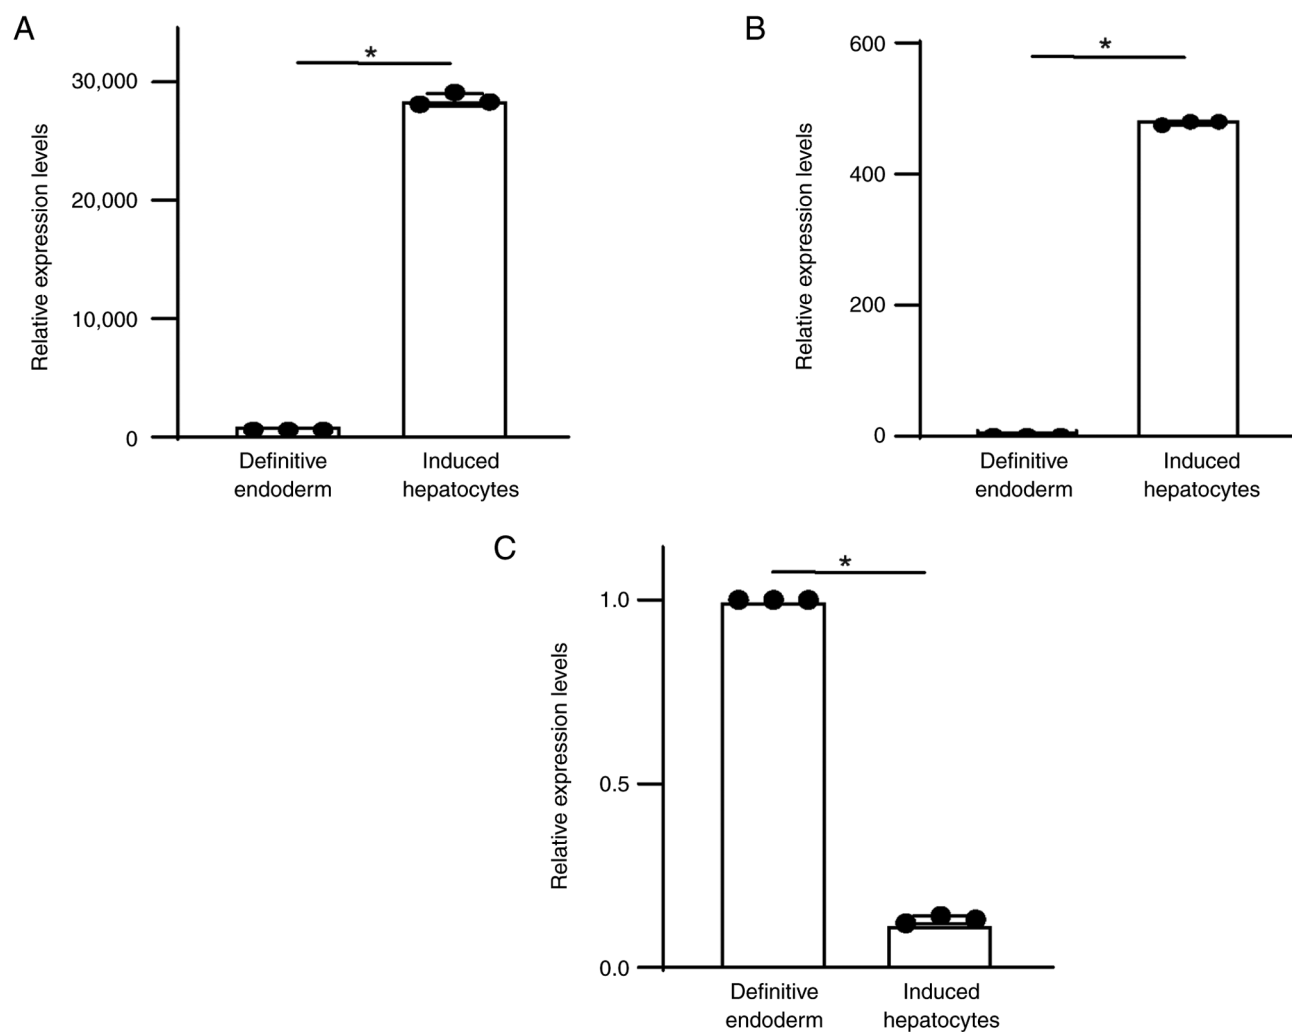

Figure S2. HCC cells take up ADAR1-containing EVs from other HCC cells. (A) Confirmation of stable expression of flag-tagged LgBiT protein in Huh7 HCC cells. A representative result of two independent experiments is shown. The same membrane was blotted for  $\beta$ -actin to confirm equivalent loading. (B) Luciferase activity using Huh7-LgBiT cell lysates after adding culture supernatant of Huh7-ADAR1-HiBiT cells. Luciferase levels are relative to negative controls without addition of culture supernatant. Data are presented as the mean  $\pm$  SD of four independent experiments. \* $P < 0.05$ . ADAR, adenosine deaminase acting on RNA-1; EV, extracellular vesicle.

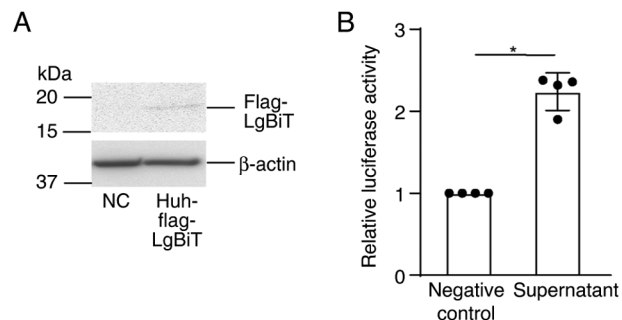

Supplement: Supplementary file 1 [file downloadSupplementary]
